# Supplementary material for: Exploring an automated indoor high-throughput phenotyping facility to investigate the response of faba bean to water stress
Source: Research Square preprint supplement (doi:10.21203/rs.3.rs-6461902/v1), 2025-05-02
Supplement: Supplementary file 1 [file d91499441d86bb08853312f9.xlsx]

## Sheet: Table S1a
Table S2a. Analysis of variance for studied parameters.
	Source	Degrees of fredom	Sum of Squares	F Ratio	Prob > F
SideView Plant Area	Accession	43	4965955	4.2162	<.0001
	Treatment	1	26654064	973.079	<.0001
	Accession*Treatment	43	2296346	1.9496	0.0012
SideView Plant Perimeter	Accession	43	1389511	5.6078	<.0001
	Treatment	1	1.98719e+06	344.857	<.0001
	Accession*Treatment	43	391268	1.5791	0.0197
SideView Plant Width	Accession	43	3043.95	6.7359	<.0001
	Treatment	1	6950.05	661.319	<.0001
	Accession*Treatment	43	953.302	2.1095	0.0003
SideView Plant Height	Accession	43	18273.3	5.0292	<.0001
	Treatment	1	37418.8	442.83	<.0001
	Accession*Treatment	43	4683.75	1.2891	0.1261
TopView Canopy Area	Accession	43	10305216	4.8046	<.0001
	Treatment	1	41895711	839.92	<.0001
	Accession*Treatment	43	5437309	2.535	<.0001
TopView Canopy Perimeter	Accession	43	522612	5.388	<.0001
	Treatment	1	817804	362.551	<.0001
	Accession*Treatment	43	220813	2.2765	<.0001
Effective Quantum Yield	Accession	43	0.0832775	1.9986	0.0008
	Treatment	1	0.421845	435.331	<.0001
	Accession*Treatment	43	0.068492	1.6438	0.0122
Non-Photochemical Quenching	Accession	43	2.42931	2.0975	0.0003
	Treatment	1	8.45397	313.871	<.0001
	Accession*Treatment	43	2.31959	2.0028	0.0007
Digital Biomass	Accession	43	1.67407e+06	8.4812	<.0001
	Treatment	1	6607615	1439.46	<.0001
	Accession*Treatment	43	1.12495e+06	5.6993	<.0001
Fresh Weight	Accession	43	90865.5	2.6761	<.0001
	Treatment	1	570162	722.067	<.0001
	Accession*Treatment	43	60834.1	1.7917	0.0041
Dry Weight	Accession	43	796.727	2.4178	<.0001
	Treatment	1	5825.86	760.225	<.0001
	Accession*Treatment	43	484.845	1.4714	0.0411
Biological WUE	Accession	43	47.3276	3.4685	<.0001
	Treatment	1	252.775	796.574	<.0001
	Accession*Treatment	43	25.951	1.9019	0.0017
Digital WUE	Accession	43	36324.4	3.4839	<.0001
	Treatment	1	42889.1	176.881	<.0001
	Accession*Treatment	43	18177.2	1.7434	0.0062
Total Water Added (37DAG)	Accession	43	112.45	7.0165	<.0001
	Treatment	1	1421.22	3813.18	<.0001
	Accession*Treatment	43	52.7084	3.2888	<.0001
Total Water Added (39DAG)	Accession	43	121.806	3.9802	<.0001
	Treatment	1	1664.72	2339.11	<.0001
	Accession*Treatment	43	56.3661	1.8419	0.0027

## Sheet: Table S1b
Table S2b. Average ± SD of measurements across accessions and treatments.
Accession Name	Water Regime	SideView Plant Area (cm2)	SideView Plant Perimeter (cm)	SideView Plant Width (cm)	SideView Plant Height (cm)	TopView Canopy Area (cm2)	TopView Canopy Perimeter (cm)	Effective Quantum Yield	Non-Photochemical Quenching	Digital Biomass (volume)	Fresh Weight (g)	Dry Weight (g)	Biological WUE (g/kg)	Digital WUE (volume/kg)	Total Water Added at 37DAG (kg)	Total Water Added at 39DAG (kg)
Aurora/2	WHC-80%	1088.83 ± 101.34	688.41 ± 18.38	28.96 ± 1.65	118.6 ± 5.27	1217.98 ± 64.56	214.52 ± 4.23	0.45 ± 0.03	1.16 ± 0.22	379.61 ± 31.28	134.87 ± 34.36	14.3 ± 3.56	2.01 ± 0.36	59.02 ± 2.68	6.46 ± 0.82	7.06 ± 0.75
	WHC-30%	490.02 ± 57.07	500.92 ± 23.41	19.22 ± 0.23	93.64 ± 0.74	482.54 ± 31.25	127.2 ± 3.7	0.42 ± 0.02	1.19 ± 0.14	107.86 ± 15.95	61.94 ± 6.94	6.8 ± 0.9	3.89 ± 0.12	70.43 ± 8.78	1.54 ± 0.18	1.74 ± 0.18
Mélodie/2	WHC-80%	1110.34 ± 32.19	589.33 ± 10.11	29.26 ± 1.5	113.3 ± 3.09	1071.89 ± 79.14	221.7 ± 25.79	0.45 ± 0.01	1.0 ± 0.13	363.23 ± 14.35	154.39 ± 15.41	16.16 ± 2.21	2.69 ± 0.29	66.84 ± 5.32	5.45 ± 0.2	5.99 ± 0.24
	WHC-30%	537.83 ± 22.84	509.3 ± 9.05	22.23 ± 1.2	93.87 ± 1.43	550.08 ± 59.85	159.2 ± 10.01	0.4 ± 0.02	1.31 ± 0.14	126.22 ± 11.92	71.87 ± 4.15	7.69 ± 0.6	5.54 ± 0.17	106.53 ± 7.45	1.18 ± 0.05	1.39 ± 0.07
ILB 938/2	WHC-80%	1031.64 ± 31.2	614.76 ± 33.04	32.54 ± 1.14	104.62 ± 3.25	1064.28 ± 41.48	353.44 ± 72.39	0.47 ± 0.02	0.94 ± 0.04	336.6 ± 15.36	130.97 ± 7.87	13.8 ± 0.94	2.74 ± 0.19	71.9 ± 1.93	4.68 ± 0.15	5.04 ± 0.17
	WHC-30%	478.36 ± 27.34	472.41 ± 59.87	20.51 ± 0.72	86.37 ± 5.98	395.51 ± 13.53	143.73 ± 1.71	0.4 ± 0.04	1.08 ± 0.17	95.08 ± 4.53	46.32 ± 8.71	5.71 ± 0.42	6.14 ± 0.41	118.83 ± 12.32	0.81 ± 0.11	0.94 ± 0.13
Birgit	WHC-80%	974.82 ± 153.51	593.18 ± 80.97	31.05 ± 2.99	103.69 ± 12.82	1077.67 ± 108.45	212.32 ± 23.12	0.46 ± 0.01	1.02 ± 0.1	321.42 ± 66.35	142.57 ± 13.9	13.89 ± 2.64	2.47 ± 0.47	61.31 ± 12.65	5.24 ± 0.1	5.62 ± 0.05
	WHC-30%	554.32 ± 116.91	477.61 ± 56.4	23.17 ± 1.32	87.63 ± 6.19	593.8 ± 110.85	158.31 ± 13.36	0.37 ± 0.02	1.5 ± 0.12	136.26 ± 39.49	76.37 ± 18.56	7.73 ± 1.94	4.25 ± 0.34	85.08 ± 4.37	1.62 ± 0.52	1.84 ± 0.56
Tiffany	WHC-80%	812.6 ± 218.8	692.76 ± 48.04	26.15 ± 3.19	114.91 ± 10.3	907.14 ± 161.12	218.89 ± 9.05	0.46 ± 0.03	1.12 ± 0.3	195.88 ± 5.25	122.07 ± 40.66	15.03 ± 3.07	2.81 ± 0.32	42.4 ± 0.32	4.62 ± 0.09	5.33 ± 0.62
	WHC-30%	507.58 ± 60.96	561.61 ± 41.71	20.45 ± 2.22	92.68 ± 9.7	523.22 ± 106.46	160.34 ± 47.36	0.39 ± 0.04	1.44 ± 0.14	116.47 ± 25.15	71.42 ± 6.83	7.46 ± 0.25	4.36 ± 0.1	75.98 ± 13.36	1.53 ± 0.06	1.71 ± 0.07
Taifun	WHC-80%	891.61 ± 131.95	550.96 ± 16.3	27.64 ± 3.14	95.75 ± 3.82	853.06 ± 101.92	214.86 ± 46.66	0.44 ± 0.06	1.23 ± 0.42	260.93 ± 42.51	129.25 ± 13.94	13.31 ± 1.86	2.56 ± 0.21	53.4 ± 6.21	4.91 ± 0.85	5.21 ± 0.83
	WHC-30%	468.92 ± 43.9	473.39 ± 56.73	18.98 ± 3.17	82.16 ± 3.68	434.02 ± 123.76	129.97 ± 39.66	0.38 ± 0.03	1.32 ± 0.19	97.76 ± 21.71	64.52 ± 2.47	6.3 ± 0.85	4.91 ± 0.99	87.03 ± 21.59	1.13 ± 0.13	1.3 ± 0.14
Hedin/2	WHC-80%	780.27 ± 222.72	502.03 ± 54.42	24.3 ± 0.84	92.65 ± 13.91	724.92 ± 48.84	168.39 ± 15.98	0.4 ± 0.01	1.27 ± 0.05	211.33 ± 66.19	89.55 ± 22.51	8.51 ± 2.66	2.12 ± 0.37	57.68 ± 9.48	3.6 ± 0.62	3.94 ± 0.62
	WHC-30%	414.62 ± 134.4	427.56 ± 34.24	18.49 ± 1.9	75.32 ± 6.58	426.2 ± 122.34	135.4 ± 25.94	0.38 ± 0.02	1.3 ± 0.05	87.41 ± 38.12	38.22 ± 10.01	3.42 ± 1.89	4.78 ± 2.54	113.96 ± 39.85	0.77 ± 0.26	0.71 ± 0.02
Kontu	WHC-80%	1109.22 ± 322.98	654.96 ± 158.84	34.22 ± 2.36	103.84 ± 24.62	1303.72 ± 208.44	272.87 ± 48.09	0.42 ± 0.02	1.09 ± 0.07	319.94 ± 39.52	131.87 ± 44.08	15.79 ± 6.74	2.57 ± 0.55	65.14 ± 6.26	4.96 ± 1.08	5.94 ± 1.4
	WHC-30%	548.34 ± 59.03	587.12 ± 22.08	27.02 ± 3.91	89.05 ± 7.28	722.6 ± 200.29	229.56 ± 72.23	0.39 ± 0.02	1.44 ± 0.1	145.53 ± 13.35	67.02 ± 3.81	7.01 ± 0.07	4.88 ± 0.7	112.09 ± 23.82	1.32 ± 0.16	1.45 ± 0.22
Fuego	WHC-80%	921.87 ± 194.94	769.38 ± 77.27	30.94 ± 2.05	107.37 ± 5.68	1068.09 ± 50.95	312.06 ± 13.32	0.46 ± 0.03	1.16 ± 0.21	302.12 ± 69.91	147.05 ± 23.83	14.37 ± 2.26	2.69 ± 0.18	60.72 ± 8.13	4.94 ± 0.54	5.33 ± 0.61
	WHC-30%	532.99 ± 86.43	547.67 ± 34.44	21.42 ± 1.97	86.25 ± 2.47	501.5 ± 66.08	155.78 ± 24.39	0.37 ± 0.03	1.6 ± 0.16	120.03 ± 27.68	77.68 ± 8.14	8.07 ± 0.85	5.75 ± 0.84	98.57 ± 19.28	1.22 ± 0.16	1.42 ± 0.19
Fanfare	WHC-80%	1202.92 ± 285.59	681.7 ± 56.05	32.34 ± 6.38	113.16 ± 6.1	1366.92 ± 559.79	258.21 ± 84.6	0.46 ± 0.03	1.08 ± 0.13	451.35 ± 189.8	146.94 ± 0.52	15.27 ± 0.7	2.62 ± 0.25	69.55 ± 13.06	6.31 ± 1.59	5.86 ± 0.83
	WHC-30%	662.17 ± 66.72	569.68 ± 73.6	25.66 ± 1.13	94.6 ± 12.27	625.74 ± 81.08	184.74 ± 23.35	0.4 ± 0.02	1.4 ± 0.15	165.61 ± 22.73	88.67 ± 15.21	9.33 ± 1.81	5.05 ± 0.16	102.18 ± 7.88	1.64 ± 0.36	1.86 ± 0.41
Brottby	WHC-80%	955.73 ± 388.5	700.63 ± 118.22	29.2 ± 5.54	104.68 ± 17.51	1039.54 ± 454.35	283.21 ± 94.03	0.45 ± 0.04	1.2 ± 0.28	410.35 ± 154.58	127.56 ± 54.97	13.34 ± 6.82	2.31 ± 0.51	65.15 ± 19.49	6.22 ± 0.51	5.53 ± 1.9
	WHC-30%	579.1 ± 12.52	595.28 ± 42.08	26.99 ± 3.55	81.44 ± 5.4	623.99 ± 127.58	237.27 ± 40.83	0.37 ± 0.05	1.48 ± 0.25	144.3 ± 16.96	67.26 ± 13.93	7.42 ± 1.29	4.67 ± 1.15	102.39 ± 13.99	1.42 ± 0.16	1.61 ± 0.21
Solberga	WHC-80%	1374.7 ± 133.53	752.39 ± 141.93	38.06 ± 7.17	125.62 ± 8.03	1460.86 ± 366.84	283.92 ± 80.85	0.46 ± 0.03	1.21 ± 0.2	526.58 ± 113.38	203.79 ± 13.47	21.58 ± 2.5	2.76 ± 0.12	72.32 ± 9.92	7.23 ± 0.62	7.81 ± 0.59
	WHC-30%	657.65 ± 81.68	543.38 ± 73.16	23.44 ± 3.82	95.23 ± 4.03	654.86 ± 133.43	164.27 ± 39.13	0.4 ± 0.04	1.43 ± 0.26	168.74 ± 34.26	88.78 ± 14.33	9.72 ± 2.0	4.85 ± 0.73	94.34 ± 11.06	1.82 ± 0.5	2.04 ± 0.57
Karra	WHC-80%	1249.72 ± 260.46	819.27 ± 56.05	34.73 ± 3.07	117.11 ± 11.55	1314.36 ± 172.5	287.3 ± 6.75	0.48 ± 0.02	0.92 ± 0.16	455.43 ± 118.79	171.5 ± 19.85	17.31 ± 1.89	2.4 ± 0.25	66.53 ± 11.94	6.79 ± 0.87	7.26 ± 0.96
	WHC-30%	687.99 ± 209.81	695.61 ± 185.57	27.04 ± 5.64	107.8 ± 2.28	723.64 ± 246.83	203.06 ± 50.78	0.39 ± 0.05	1.36 ± 0.09	139.25 ± 29.86	85.08 ± 21.84	9.62 ± 2.32	4.33 ± 0.48	85.62 ± 20.75	1.63 ± 0.05	2.26 ± 0.7
Odenslund	WHC-80%	1254.63 ± 269.71	706.27 ± 21.04	34.71 ± 4.09	112.0 ± 4.62	1689.14 ± 4.66	327.31 ± 39.3	0.44 ± 0.05	1.33 ± 0.27	579.23 ± 18.72	185.55 ± 53.18	19.28 ± 4.58	3.02 ± 0.48	93.71 ± 3.54	6.19 ± 0.43	6.32 ± 0.63
	WHC-30%	602.47 ± 44.13	611.91 ± 32.24	28.55 ± 3.31	81.31 ± 11.23	564.81 ± 289.29	243.8 ± 6.12	0.4 ± 0.07	1.23 ± 0.09	123.94 ± 65.91	58.05 ± 22.74	5.72 ± 1.87	4.21 ± 0.77	93.57 ± 33.26	1.25 ± 0.34	1.37 ± 0.42
Lovanger	WHC-80%	1089.8 ± 118.55	824.35 ± 78.34	32.85 ± 2.45	129.91 ± 3.4	1424.99 ± 166.04	284.34 ± 32.11	0.46 ± 0.03	1.09 ± 0.15	411.01 ± 50.05	164.91 ± 30.63	18.77 ± 2.1	3.07 ± 0.23	72.49 ± 1.07	5.68 ± 0.75	6.14 ± 0.84
	WHC-30%	569.06 ± 3.78	722.72 ± 92.35	26.92 ± 1.34	120.15 ± 9.67	894.83 ± 115.21	257.67 ± 36.39	0.36 ± 0.04	1.59 ± 0.16	170.02 ± 11.88	85.8 ± 5.07	9.72 ± 1.3	5.35 ± 0.88	105.81 ± 8.83	1.61 ± 0.13	1.83 ± 0.13
Dalabona	WHC-80%	1270.04 ± 77.98	726.53 ± 78.67	36.84 ± 4.63	108.37 ± 3.83	1446.73 ± 229.59	292.31 ± 74.74	0.48 ± 0.03	0.9 ± 0.11	483.38 ± 65.36	183.9 ± 34.38	17.9 ± 3.38	2.41 ± 0.24	72.06 ± 12.98	6.76 ± 0.71	7.38 ± 0.85
	WHC-30%	660.96 ± 139.75	550.88 ± 55.28	24.7 ± 2.34	90.28 ± 12.24	624.86 ± 135.8	184.52 ± 44.7	0.38 ± 0.04	1.37 ± 0.18	166.66 ± 48.66	81.94 ± 18.88	6.9 ± 2.22	3.32 ± 1.69	83.46 ± 27.22	2.08 ± 0.76	2.31 ± 0.88
Ekholmen	WHC-80%	1130.85 ± 81.4	525.37 ± 8.41	31.98 ± 3.43	93.84 ± 5.03	1144.82 ± 157.78	238.63 ± 21.36	0.48 ± 0.02	0.95 ± 0.17	382.41 ± 45.06	149.83 ± 6.69	14.2 ± 0.86	2.37 ± 0.1	68.57 ± 7.02	5.59 ± 0.53	6.0 ± 0.59
	WHC-30%	746.44 ± 132.56	452.28 ± 30.63	26.55 ± 2.84	76.95 ± 3.6	778.08 ± 70.69	213.1 ± 14.85	0.41 ± 0.03	1.3 ± 0.1	208.86 ± 45.11	96.87 ± 12.56	10.25 ± 1.59	4.54 ± 0.53	102.66 ± 17.42	2.03 ± 0.12	2.25 ± 0.09
Bohus delikatess	WHC-80%	982.55 ± 74.3	719.5 ± 41.77	31.47 ± 3.02	113.18 ± 15.24	1305.88 ± 43.39	268.4 ± 61.33	0.5 ± 0.02	0.87 ± 0.15	354.9 ± 24.64	146.49 ± 0.71	15.6 ± 1.25	2.53 ± 0.26	61.43 ± 2.16	5.77 ± 0.27	6.19 ± 0.31
	WHC-30%	521.25 ± 94.82	533.18 ± 67.47	23.23 ± 2.56	88.73 ± 2.17	569.92 ± 120.38	159.44 ± 18.52	0.39 ± 0.01	1.34 ± 0.09	124.5 ± 30.16	64.74 ± 12.38	7.34 ± 1.4	4.74 ± 0.36	90.94 ± 6.08	1.36 ± 0.26	1.55 ± 0.29
Primus	WHC-80%	880.85 ± 202.58	592.35 ± 8.02	30.02 ± 1.13	103.34 ± 6.78	1115.25 ± 107.1	260.68 ± 23.58	0.45 ± 0.01	1.18 ± 0.11	296.03 ± 79.58	117.52 ± 29.56	11.48 ± 4.23	2.35 ± 0.38	67.34 ± 7.87	4.43 ± 1.3	4.81 ± 1.47
	WHC-30%	552.87 ± 244.14	459.6 ± 111.31	21.74 ± 4.25	90.05 ± 26.72	605.18 ± 278.23	176.14 ± 72.85	0.4 ± 0.01	1.42 ± 0.11	191.27 ± 27.06	64.4 ± 30.96	5.97 ± 3.38	5.09 ± 0.62	141.7 ± 5.95	1.35 ± 0.13	1.19 ± 0.66
Romfartuna	WHC-80%	966.68 ± 115.24	808.74 ± 125.63	29.52 ± 2.91	110.35 ± 7.5	945.12 ± 199.07	287.9 ± 82.76	0.46 ± 0.09	0.77 ± 0.08	298.5 ± 66.17	140.3 ± 25.69	14.47 ± 1.51	2.39 ± 0.11	52.21 ± 5.59	5.68 ± 0.73	6.08 ± 0.87
	WHC-30%	706.28 ± 103.23	742.73 ± 108.32	26.55 ± 2.66	98.34 ± 9.23	768.38 ± 168.11	276.24 ± 64.9	0.44 ± 0.04	1.23 ± 0.22	195.71 ± 40.38	90.32 ± 8.63	10.28 ± 1.42	4.6 ± 0.03	96.83 ± 9.86	2.01 ± 0.27	2.24 ± 0.3
Tyrja me0202	WHC-80%	1205.19 ± 280.58	772.27 ± 138.42	38.92 ± 6.67	109.92 ± 7.47	1685.17 ± 416.25	358.32 ± 96.16	0.44 ± 0.08	0.84 ± 0.1	593.27 ± 0.29	165.93 ± 38.95	16.04 ± 4.38	2.55 ± 0.33	98.36 ± 11.58	6.07 ± 0.71	6.21 ± 0.88
	WHC-30%	571.29 ± 64.59	537.94 ± 64.09	23.58 ± 3.05	89.52 ± 7.33	562.66 ± 115.12	159.94 ± 23.31	0.36 ± 0.03	1.51 ± 0.13	134.65 ± 17.58	71.44 ± 3.51	7.24 ± 0.64	4.69 ± 0.77	104.98 ± 44.9	1.38 ± 0.35	1.58 ± 0.33
Rantala me1001	WHC-80%	1380.52 ± 400.72	601.06 ± 133.19	38.35 ± 6.99	98.3 ± 13.7	1526.28 ± 389.04	387.33 ± 20.38	0.47 ± 0.03	0.92 ± 0.07	422.55 ± 90.17	176.12 ± 88.52	16.27 ± 8.85	2.22 ± 0.55	79.35 ± 6.92	5.4 ± 1.61	6.95 ± 2.27
	WHC-30%	570.91 ± 52.46	456.5 ± 13.44	24.46 ± 0.02	67.14 ± 2.68	511.94 ± 22.92	180.57 ± 17.16	0.37 ± 0.02	1.57 ± 0.14	129.29 ± 14.06	65.53 ± 7.1	5.82 ± 0.63	3.84 ± 0.63	100.56 ± 23.55	1.33 ± 0.24	1.55 ± 0.28
Suontakainen me0302	WHC-80%	1527.74 ± 83.82	739.27 ± 26.79	39.45 ± 1.94	119.13 ± 4.47	1759.26 ± 154.64	342.44 ± 24.82	0.47 ± 0.04	1.03 ± 0.09	640.55 ± 49.04	222.36 ± 12.79	20.3 ± 1.64	2.63 ± 0.09	90.03 ± 2.85	7.13 ± 0.7	7.75 ± 0.87
	WHC-30%	615.55 ± 53.24	485.81 ± 3.73	21.35 ± 0.99	96.88 ± 11.07	538.96 ± 17.09	172.46 ± 22.85	0.39 ± 0.07	1.27 ± 0.26	141.66 ± 10.88	73.54 ± 1.92	7.52 ± 0.26	5.54 ± 0.74	120.25 ± 26.57	1.2 ± 0.18	1.37 ± 0.19
Korkeamaki	WHC-80%	1320.04 ± 199.33	733.17 ± 65.61	39.06 ± 3.79	112.04 ± 3.85	1926.99 ± 580.4	346.63 ± 34.06	0.45 ± 0.02	0.98 ± 0.15	480.98 ± 12.98	174.0 ± 8.59	16.49 ± 1.3	2.17 ± 0.41	73.98 ± 6.02	6.52 ± 0.35	7.71 ± 1.0
	WHC-30%	706.16 ± 101.88	625.22 ± 31.97	30.02 ± 2.98	90.25 ± 4.28	848.09 ± 119.56	238.31 ± 27.15	0.38 ± 0.03	1.39 ± 0.06	206.0 ± 39.65	84.7 ± 2.64	7.9 ± 0.89	3.75 ± 0.58	109.88 ± 16.95	1.87 ± 0.08	2.12 ± 0.11
Sairala me0503	WHC-80%	1286.2 ± 205.28	752.75 ± 46.84	38.73 ± 1.83	107.19 ± 0.76	1701.32 ± 249.58	344.53 ± 30.42	0.49 ± 0.01	1.0 ± 0.05	531.16 ± 106.2	192.73 ± 52.89	18.03 ± 4.34	2.48 ± 0.43	79.03 ± 10.44	6.69 ± 0.62	7.22 ± 0.57
	WHC-30%	483.5 ± 35.48	482.09 ± 53.29	20.86 ± 0.15	87.1 ± 15.24	454.76 ± 49.12	134.88 ± 15.44	0.37 ± 0.04	1.44 ± 0.09	103.17 ± 12.0	56.9 ± 5.11	5.39 ± 0.71	3.22 ± 0.51	67.69 ± 9.5	1.53 ± 0.08	1.68 ± 0.06
Horshult	WHC-80%	1163.07 ± 156.91	750.54 ± 42.71	38.28 ± 7.3	106.53 ± 4.72	1525.03 ± 405.76	408.47 ± 133.84	0.52 ± 0.0	0.8 ± 0.03	525.74 ± 7.91	152.53 ± 18.1	15.32 ± 2.47	2.22 ± 0.23	81.01 ± 5.39	6.5 ± 0.34	6.86 ± 0.42
	WHC-30%	576.68 ± 61.27	571.52 ± 38.17	30.29 ± 4.26	79.65 ± 4.46	870.46 ± 237.02	281.05 ± 47.5	0.45 ± 0.02	1.17 ± 0.12	170.55 ± 40.6	68.85 ± 4.55	6.85 ± 0.81	4.28 ± 1.06	116.5 ± 17.67	1.46 ± 0.19	1.64 ± 0.25
Saari	WHC-80%	1527.11 ± 425.18	734.89 ± 240.19	39.07 ± 7.26	117.6 ± 14.43	1753.24 ± 702.03	306.14 ± 116.76	0.44 ± 0.03	1.16 ± 0.16	814.14 ± 14.33	213.55 ± 62.74	21.82 ± 5.82	2.68 ± 0.36	101.35 ± 4.69	8.04 ± 0.23	8.04 ± 1.22
	WHC-30%	700.64 ± 131.49	550.62 ± 17.99	28.26 ± 0.43	80.81 ± 2.07	757.51 ± 68.82	210.37 ± 19.19	0.36 ± 0.03	1.5 ± 0.07	193.55 ± 44.21	83.49 ± 11.66	7.61 ± 1.58	4.45 ± 1.23	126.53 ± 37.7	1.6 ± 0.48	1.8 ± 0.55
Gubbestad	WHC-80%	1205.79 ± 109.25	767.48 ± 54.55	35.72 ± 2.01	108.74 ± 10.88	1453.45 ± 271.61	301.86 ± 53.16	0.49 ± 0.05	0.9 ± 0.2	459.88 ± 75.43	183.33 ± 9.92	18.9 ± 1.99	2.63 ± 0.55	68.85 ± 17.59	6.8 ± 0.82	7.31 ± 0.89
	WHC-30%	540.14 ± 66.61	585.07 ± 45.93	26.14 ± 2.21	86.6 ± 7.06	649.28 ± 86.86	236.56 ± 50.17	0.4 ± 0.04	1.33 ± 0.14	138.14 ± 25.72	70.97 ± 9.48	7.43 ± 1.18	4.24 ± 0.43	88.62 ± 9.69	1.55 ± 0.13	1.75 ± 0.13
Goteryd	WHC-80%	1230.76 ± 77.53	768.47 ± 159.48	36.18 ± 3.0	109.82 ± 11.55	1438.59 ± 252.05	363.69 ± 47.9	0.51 ± 0.01	0.88 ± 0.11	465.02 ± 43.69	189.81 ± 13.12	17.51 ± 0.93	2.44 ± 0.15	69.51 ± 9.18	6.72 ± 0.41	7.19 ± 0.4
	WHC-30%	585.37 ± 63.94	546.22 ± 80.26	26.83 ± 5.44	77.27 ± 5.38	581.39 ± 199.95	231.07 ± 89.22	0.41 ± 0.01	1.33 ± 0.1	141.47 ± 39.58	67.64 ± 5.78	7.18 ± 1.05	3.9 ± 0.96	84.71 ± 29.26	1.71 ± 0.23	1.88 ± 0.2
Imatra me0101	WHC-80%	1259.48 ± 427.17	629.43 ± 40.2	36.96 ± 7.77	97.19 ± 4.88	1353.0 ± 546.72	347.27 ± 74.8	0.49 ± 0.01	0.95 ± 0.02	477.37 ± 255.59	167.62 ± 68.46	15.77 ± 7.68	2.19 ± 0.24	71.08 ± 16.93	6.48 ± 2.31	7.02 ± 2.67
	WHC-30%	620.83 ± 164.08	484.83 ± 124.03	22.95 ± 4.65	83.01 ± 5.65	602.73 ± 230.66	154.63 ± 37.28	0.34 ± 0.02	1.76 ± 0.16	155.49 ± 71.66	75.34 ± 17.79	7.23 ± 2.06	3.68 ± 0.66	85.64 ± 20.65	1.77 ± 0.43	1.98 ± 0.46
Lemi me0702	WHC-80%	1367.1 ± 418.89	743.81 ± 172.41	38.38 ± 4.87	105.71 ± 17.14	1382.62 ± 503.65	278.06 ± 76.15	0.44 ± 0.03	1.24 ± 0.16	317.56 ± 60.62	171.38 ± 56.7	15.84 ± 5.01	2.68 ± 0.25	65.25 ± 1.98	4.85 ± 0.78	5.82 ± 1.31
	WHC-30%	560.07 ± 152.11	505.74 ± 51.38	24.66 ± 3.87	78.38 ± 3.16	576.86 ± 160.36	188.56 ± 35.31	0.41 ± 0.01	1.32 ± 0.04	136.77 ± 56.52	66.16 ± 21.06	6.47 ± 2.3	4.8 ± 0.58	116.89 ± 14.54	1.2 ± 0.6	1.4 ± 0.69
Kokkosenkyla	WHC-80%	1490.37 ± 220.4	869.6 ± 62.02	41.26 ± 3.21	120.96 ± 19.79	1827.82 ± 415.69	412.45 ± 42.78	0.48 ± 0.01	0.99 ± 0.18	641.18 ± 168.69	176.46 ± 26.13	19.18 ± 1.56	2.55 ± 0.37	90.23 ± 17.73	7.05 ± 0.44	7.56 ± 0.54
	WHC-30%	653.54 ± 15.43	550.51 ± 33.1	26.13 ± 0.35	80.31 ± 4.4	647.2 ± 31.2	205.23 ± 20.26	0.35 ± 0.05	1.58 ± 0.2	166.29 ± 7.89	76.28 ± 3.23	7.96 ± 0.55	4.46 ± 0.86	104.18 ± 19.63	1.62 ± 0.23	1.81 ± 0.24
AP8308100101	WHC-80%	1325.75 ± 48.16	715.94 ± 111.69	40.02 ± 0.65	101.5 ± 12.65	1902.15 ± 129.79	353.98 ± 38.13	0.44 ± 0.05	1.08 ± 0.4	578.34 ± 37.76	160.06 ± 39.55	15.54 ± 3.73	2.13 ± 0.46	86.3 ± 7.56	6.72 ± 0.45	7.26 ± 0.37
	WHC-30%	670.59 ± 85.7	535.59 ± 70.22	28.55 ± 0.91	86.29 ± 12.99	846.07 ± 225.04	252.35 ± 13.62	0.37 ± 0.05	1.35 ± 0.27	195.68 ± 49.85	78.14 ± 10.18	7.56 ± 1.43	3.91 ± 0.26	115.35 ± 17.18	1.68 ± 0.18	1.92 ± 0.24
Seikanlampi	WHC-80%	1252.65 ± 229.4	778.35 ± 111.93	38.32 ± 3.34	115.99 ± 18.09	1739.37 ± 317.25	355.37 ± 85.1	0.47 ± 0.01	0.98 ± 0.07	526.02 ± 140.41	157.07 ± 75.7	16.13 ± 8.21	2.24 ± 0.83	84.64 ± 15.66	6.28 ± 1.51	6.85 ± 1.57
	WHC-30%	600.68 ± 109.66	583.65 ± 9.01	26.48 ± 2.74	86.46 ± 6.91	741.79 ± 170.42	231.23 ± 6.74	0.35 ± 0.01	1.55 ± 0.19	165.1 ± 46.74	70.53 ± 11.05	7.12 ± 1.21	4.28 ± 0.13	111.79 ± 16.65	1.46 ± 0.29	1.67 ± 0.31
Sairalame0401sepb	WHC-80%	1589.2 ± 114.9	730.09 ± 15.38	37.53 ± 3.2	115.65 ± 0.86	1716.26 ± 94.32	290.08 ± 22.09	0.48 ± 0.03	0.92 ± 0.31	658.9 ± 65.69	192.77 ± 22.49	20.08 ± 2.47	2.67 ± 0.38	96.77 ± 14.54	6.94 ± 1.72	5.66 ± 3.77
	WHC-30%	727.04 ± 44.82	598.32 ± 52.55	25.82 ± 2.59	89.6 ± 6.45	715.96 ± 62.51	204.77 ± 29.08	0.38 ± 0.03	1.49 ± 0.18	194.48 ± 15.78	84.65 ± 14.46	8.93 ± 1.5	4.16 ± 0.72	102.08 ± 13.42	1.91 ± 0.1	2.15 ± 0.05
Aunuksen kanta	WHC-80%	1503.65 ± 144.17	702.6 ± 47.76	40.77 ± 0.96	99.03 ± 1.02	1765.64 ± 108.16	387.86 ± 61.51	0.47 ± 0.01	1.11 ± 0.02	632.82 ± 79.13	215.86 ± 24.21	19.33 ± 2.32	2.3 ± 0.61	79.99 ± 11.8	7.98 ± 1.11	8.63 ± 1.3
	WHC-30%	768.79 ± 106.28	556.5 ± 109.62	28.19 ± 2.63	77.03 ± 8.69	814.39 ± 126.41	236.73 ± 46.04	0.36 ± 0.04	1.39 ± 0.15	220.5 ± 48.05	107.3 ± 14.24	10.56 ± 1.16	4.09 ± 0.16	94.17 ± 14.98	2.33 ± 0.17	2.58 ± 0.22
Bondbona fran Kurt Jonsson	WHC-80%	1345.94 ± 116.49	798.12 ± 30.93	34.75 ± 0.43	122.7 ± 3.29	1406.6 ± 52.38	304.3 ± 49.2	0.51 ± 0.01	0.87 ± 0.15	504.73 ± 45.02	204.97 ± 17.4	20.13 ± 1.2	2.55 ± 0.13	68.76 ± 4.64	7.35 ± 0.54	7.91 ± 0.55
	WHC-30%	726.28 ± 82.85	520.82 ± 67.3	27.47 ± 3.51	83.31 ± 3.54	718.02 ± 114.94	245.6 ± 30.45	0.41 ± 0.02	1.3 ± 0.03	194.71 ± 33.34	87.38 ± 14.39	8.54 ± 1.26	3.99 ± 0.29	100.47 ± 8.17	1.93 ± 0.21	2.13 ± 0.19
LAITIALA AP0101	WHC-80%	1442.94 ± 66.75	721.56 ± 110.91	40.24 ± 1.43	106.62 ± 10.65	1688.89 ± 162.2	357.98 ± 35.0	0.48 ± 0.01	0.93 ± 0.1	593.35 ± 54.87	188.52 ± 8.89	19.13 ± 1.89	2.61 ± 0.13	88.54 ± 7.65	6.71 ± 0.43	7.34 ± 0.57
	WHC-30%	632.21 ± 17.21	417.96 ± 68.57	26.6 ± 0.18	68.24 ± 7.68	738.97 ± 17.66	196.91 ± 10.18	0.39 ± 0.02	1.24 ± 0.16	171.83 ± 4.3	72.3 ± 1.46	7.08 ± 0.37	4.04 ± 0.25	116.2 ± 12.83	1.5 ± 0.23	1.76 ± 0.22
Sodergarden	WHC-80%	1445.37 ± 142.73	741.28 ± 66.83	37.11 ± 4.77	109.74 ± 4.79	1566.58 ± 315.9	348.97 ± 102.64	0.48 ± 0.02	1.13 ± 0.15	573.68 ± 113.41	223.59 ± 31.16	22.15 ± 2.21	2.66 ± 0.19	74.09 ± 14.79	7.75 ± 0.23	8.32 ± 0.25
	WHC-30%	616.88 ± 15.29	532.32 ± 90.05	24.86 ± 1.03	85.87 ± 11.81	622.76 ± 23.6	203.18 ± 40.12	0.42 ± 0.01	1.24 ± 0.18	153.92 ± 4.69	77.31 ± 3.13	8.34 ± 0.93	4.63 ± 0.24	96.35 ± 6.75	1.6 ± 0.16	1.8 ± 0.13
Pirhonen	WHC-80%	1393.41 ± 185.51	738.64 ± 80.66	38.1 ± 0.59	113.84 ± 8.23	1738.69 ± 221.27	341.42 ± 34.96	0.47 ± 0.02	1.1 ± 0.12	582.88 ± 110.28	189.0 ± 42.4	18.47 ± 3.07	2.59 ± 0.13	89.84 ± 17.72	6.59 ± 1.32	7.17 ± 1.41
	WHC-30%	385.26 ± 199.01	422.22 ± 78.25	22.87 ± 4.57	78.34 ± 10.78	537.58 ± 112.65	171.59 ± 54.25	0.38 ± 0.02	1.44 ± 0.26	92.08 ± 54.3	39.75 ± 19.77	4.41 ± 2.12	4.91 ± 0.97	120.27 ± 13.68	0.79 ± 0.49	0.96 ± 0.54
Asbro	WHC-80%	1465.89 ± 220.28	921.48 ± 89.36	37.88 ± 2.57	121.56 ± 4.68	1573.63 ± 290.0	368.63 ± 18.64	0.51 ± 0.02	0.88 ± 0.1	584.41 ± 136.84	196.15 ± 33.1	18.28 ± 3.4	2.1 ± 0.3	73.52 ± 18.96	7.98 ± 0.3	8.66 ± 0.45
	WHC-30%	607.11 ± 29.86	584.59 ± 44.87	24.04 ± 2.57	86.15 ± 5.11	614.67 ± 71.4	209.99 ± 35.14	0.34 ± 0.03	1.47 ± 0.07	150.47 ± 13.5	71.52 ± 15.79	6.77 ± 2.03	3.64 ± 1.11	90.46 ± 9.55	1.68 ± 0.28	1.9 ± 0.32
HAVO ME0801	WHC-80%	1481.09 ± 524.26	775.28 ± 64.66	38.27 ± 5.6	116.12 ± 22.41	1831.12 ± 623.51	323.45 ± 97.69	0.47 ± 0.0	1.06 ± 0.21	818.79 ± 224.52	218.59 ± 74.23	20.81 ± 7.37	2.66 ± 0.16	96.77 ± 13.07	8.38 ± 1.19	7.74 ± 2.41
	WHC-30%	541.72 ± 66.87	514.0 ± 80.21	23.43 ± 1.08	80.22 ± 11.96	593.29 ± 24.05	166.71 ± 9.85	0.42 ± 0.03	1.39 ± 0.22	132.13 ± 18.74	66.89 ± 12.04	6.64 ± 1.74	2.97 ± 0.59	66.69 ± 14.23	2.06 ± 0.59	2.28 ± 0.6
Sigvard	WHC-80%	1235.81 ± 316.29	682.87 ± 86.5	33.99 ± 5.83	109.06 ± 7.4	1204.99 ± 345.38	277.47 ± 45.14	0.46 ± 0.04	1.15 ± 0.26	500.77 ± 193.28	158.06 ± 4.04	17.33 ± 1.12	2.24 ± 0.45	64.03 ± 11.39	7.67 ± 1.65	7.9 ± 1.38
	WHC-30%	606.42 ± 13.89	555.46 ± 57.81	26.48 ± 1.64	85.44 ± 16.06	711.5 ± 44.74	236.88 ± 7.35	0.42 ± 0.01	1.3 ± 0.07	161.64 ± 2.86	120.34 ± 78.5	8.11 ± 0.79	3.82 ± 0.44	84.07 ± 9.96	1.94 ± 0.21	2.13 ± 0.19
Osel	WHC-80%	1666.02 ± 265.2	654.71 ± 65.37	41.35 ± 1.15	98.2 ± 11.58	1842.32 ± 195.72	393.5 ± 34.16	0.46 ± 0.04	1.08 ± 0.23	718.3 ± 153.75	144.13 ± 66.37	17.67 ± 3.61	2.16 ± 0.14	94.23 ± 10.25	7.61 ± 1.22	8.13 ± 1.18
	WHC-30%	729.97 ± 133.06	476.36 ± 125.04	31.52 ± 4.78	67.85 ± 7.34	834.87 ± 203.49	264.58 ± 90.64	0.4 ± 0.03	1.35 ± 0.12	212.57 ± 60.82	88.62 ± 15.48	8.23 ± 1.65	4.45 ± 0.89	124.16 ± 9.92	1.7 ± 0.37	1.88 ± 0.4
